# Supplementary material
Source: MDPI journal article supplement (https://www.mdpi.com/2673-4540/2/2/8)
Supplement: s1 [file s1]

Archive with 1 entries (1 files):
- diabetology-1172377-supplementary.pdf
