# Supplementary material
Source: MDPI journal article supplement (https://www.mdpi.com/2673-4540/2/2/8)
Supplement: s1 [file s1 › diabetology-1172377-supplementary.pdf]

Supplementary data

Supplementary Figure

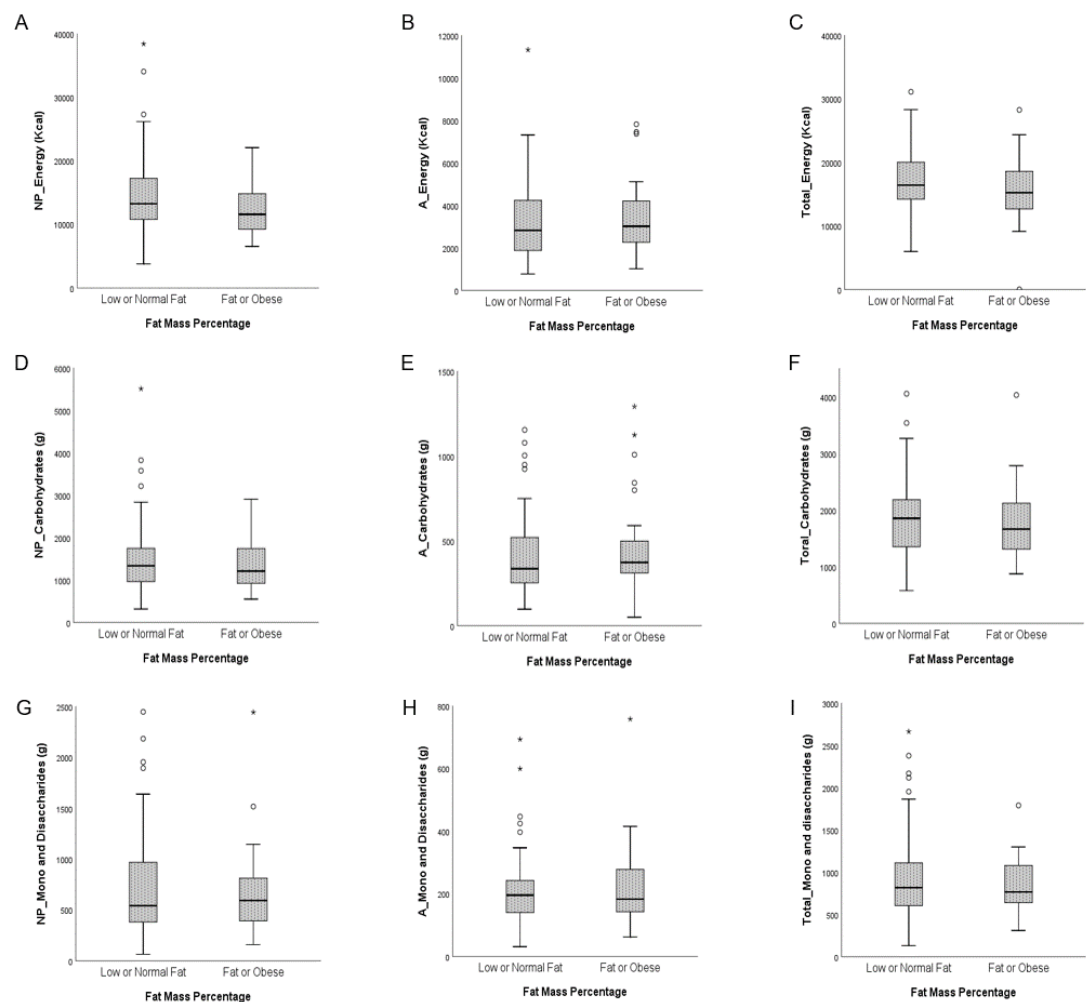

**Figure S1.** Distribution of energy and carbohydrates consumption in individuals with low or normal fat mass and individuals with higher fat mass percentage, defined accordingly to established cut-off points. Data shown weekly consumption of energy (A, B, C), carbohydrates (D, E, F) and mono and disaccharides fatty acids (G, H, I) from naturally present (left column) or added sources (central column), as well as the total weekly consumption (right column).

**Table S1.** Summary of the Spearman correlation analysis between Hip Circumference and Waist/Hip Ratio with the sources of dietary lipids and sugars.

|                                  | Hip (cm) |         | Waist/Hip |         |
|----------------------------------|----------|---------|-----------|---------|
|                                  | $\rho$   | p value | $\rho$    | p value |
| <b>NKQ</b>                       |          |         |           |         |
| <b>NP_Energy (Kcal)</b>          |          |         |           |         |
| <b>NP_Fat (g)</b>                | -0.261   | 0.02    |           |         |
| <b>NP_MUFA (g)</b>               | -0.227   | 0.044   |           |         |
| <b>NP_Uns FA (g)</b>             |          |         |           |         |
| <b>NP_Sat FA (g)</b>             | -0.338   | 0.002   |           |         |
| <b>NP_Cholesterol (g)</b>        |          |         |           |         |
| <b>NP_Carbohydrates (g)</b>      |          |         |           |         |
| <b>NP_Mono/Disaccharides (g)</b> |          |         | -0.283    | 0.011   |
| <b>A_Energy (Kcal)</b>           |          |         |           |         |
| <b>A_Fat (g)</b>                 |          |         |           |         |
| <b>A_MUFA (g)</b>                |          |         |           |         |
| <b>A_Uns FA (g)</b>              |          |         |           |         |
| <b>A_Sat FA (g)</b>              |          |         |           |         |
| <b>A_Cholesterol (g)</b>         |          |         | 0.232     | 0.039   |
| <b>A_Carbohydrates (g)</b>       |          |         |           |         |
| <b>A_Mono/Disaccharides (g)</b>  |          |         |           |         |
| <b>Total_Energy (Kcal)</b>       |          |         |           |         |
| <b>Total_Fat (g)</b>             | -0.285   | 0.011   |           |         |
| <b>Total_MUFA (g)</b>            | -0.236   | 0.036   |           |         |
| <b>Total_Uns FA (g)</b>          |          |         |           |         |
| <b>Total_Sat FA (g)</b>          | -0.302   | 0.007   |           |         |
| <b>Total_Cholesterol (g)</b>     |          |         |           |         |
| <b>Total_Carbohydrates (g)</b>   |          |         |           |         |
| <b>Total_Mono/Disacch. (g)</b>   |          |         |           |         |
